# Supplementary material
Source: PubMed Central journal article supplement (PMC2556461)
Supplement: NIHMS60195-supplement-01.pdf [file NIHMS60195-supplement-01.pdf]

## Generation of T Follicular Helper Cells Is Mediated by Interleukin-21 but Independent of T Helper 1, 2, or 17 Cell Lineages

Roza I. Nurieva, Yeonseok Chung, Dahee Hwang, Xuexian O. Yang, Hong Soon Kang, Li Ma, Yi-hong Wang, Stephanie S. Watowich, Anton M. Jetten, Qiang Tian, and Chen Dong

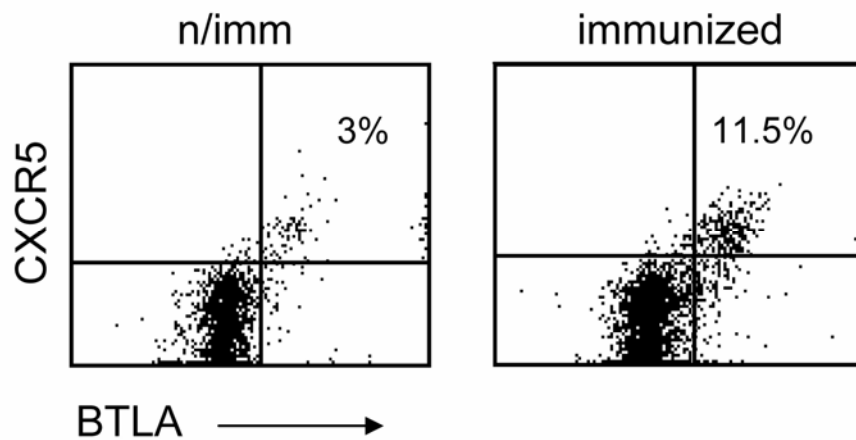

**Figure S1. T follicular helper cells co-express CXCR5 and BTLA.** C57BL/6 mice were immunized with KLH in CFA. Seven days after the immunization, experimental mice were sacrificed and the Tfh cell induction was determined by staining CD4 cells with PE-labeled anti-BTLA mAb and biotinylated CXCR5 mAb, followed by APC-labeled streptavidin.

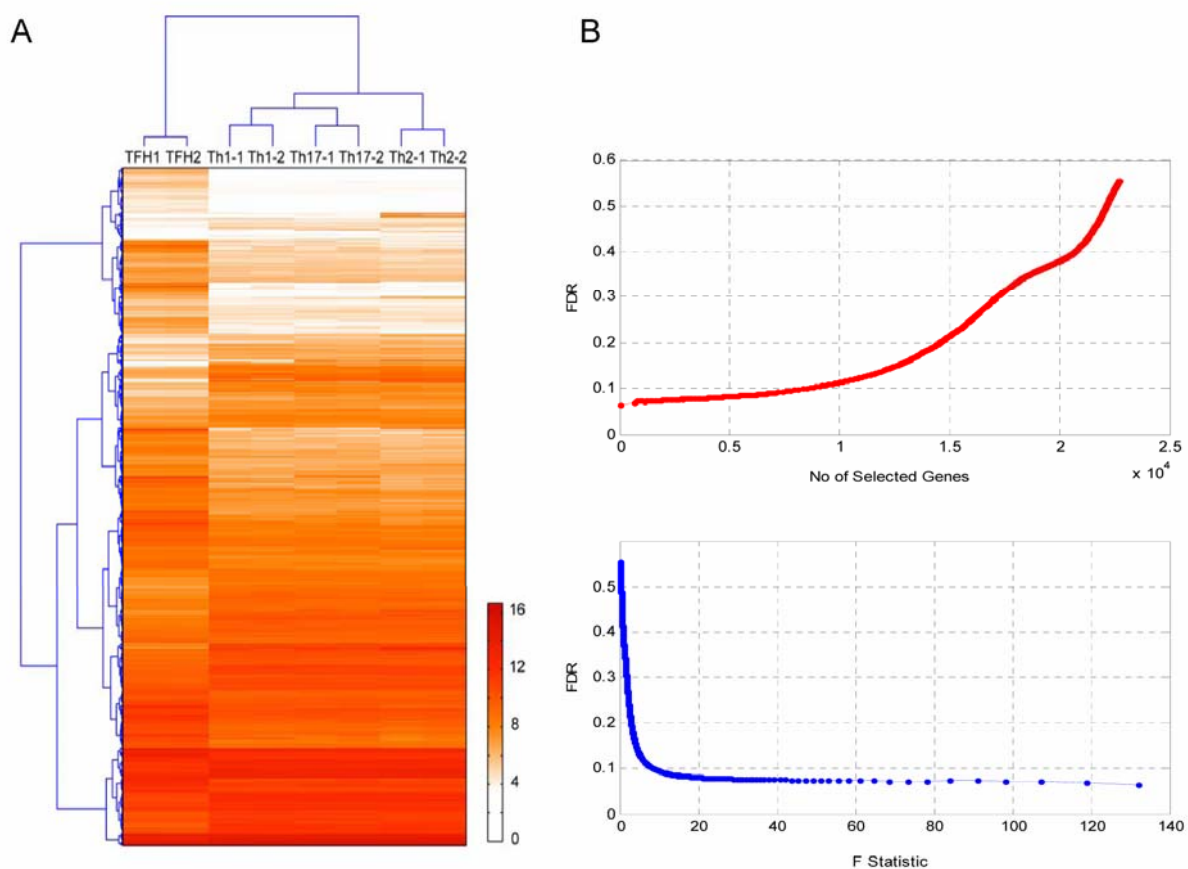

**Figure S2. Gene expression profile of Tfh cells.** (A). C57BL/6 mice were immunized with KLH in CFA. 7 days later CD4<sup>+</sup>CD44<sup>hi</sup>CXCR5<sup>+</sup> BTLA<sup>+</sup> (Tfh) cells were sorted and restimulated with anti-CD3 for 4 hours for gene profiling analysis. (B). FDR estimated from ANOVA tests using resampled samples.

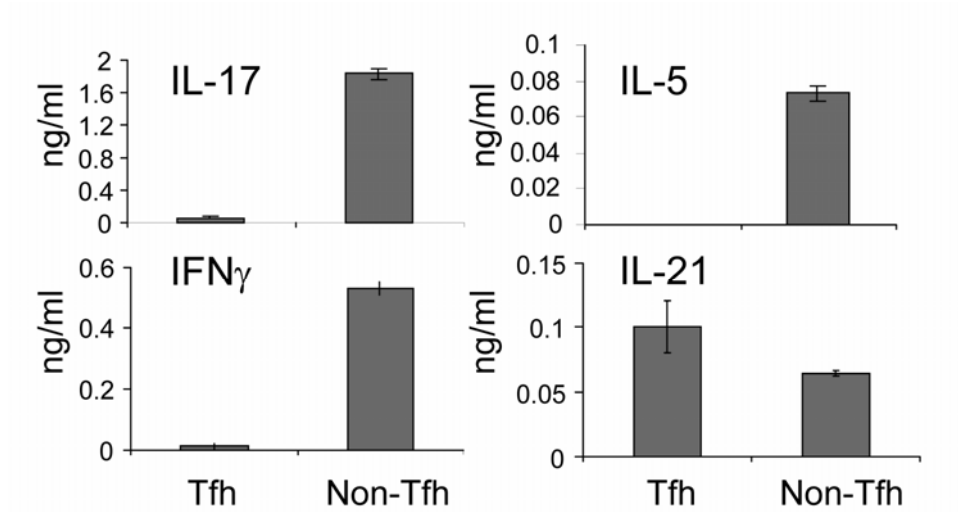

**Figure S3. Antigen-specific cytokine production by Tfh cells.** C57BL/6 mice were immunized with KLH in CFA. 7 days later CD4<sup>+</sup>CD44<sup>hi</sup>CXCR5<sup>+</sup> (Tfh) and CD4<sup>+</sup>CD44<sup>hi</sup>CXCR5<sup>-</sup> (non-Tfh) cells were sorted and restimulated with KLH and irradiated APC for 48 hours for cytokine measurement by ELISA. The graph shows means  $\pm$  standard deviation (SD).

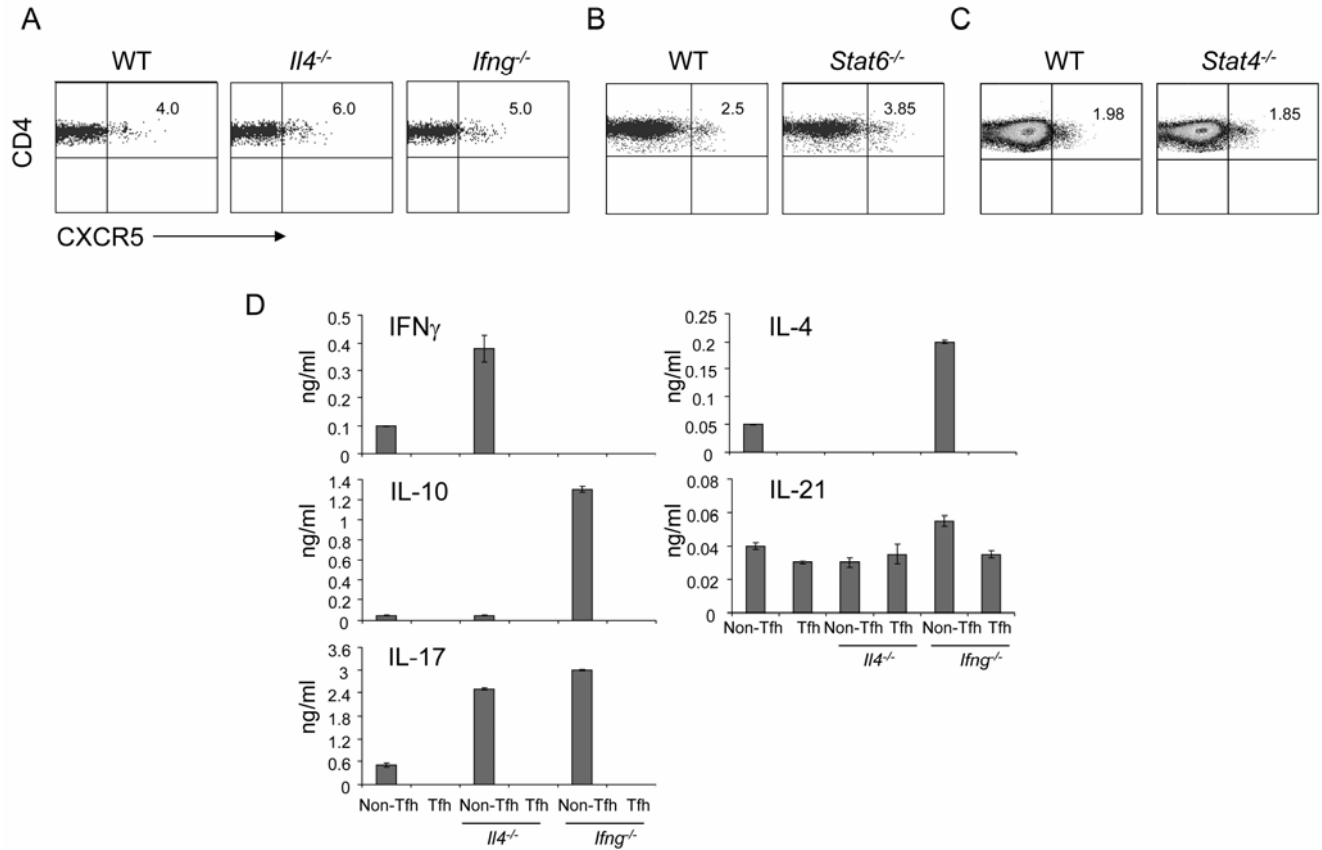

**Figure S4. Tfh cell generation is independent of Th1 and Th2 cells.** (A-C). Basal levels of CXCR5 expression in non-immunized *Il4*<sup>-/-</sup>, *Ifng*<sup>-/-</sup>, *Stat6*<sup>-/-</sup> and *Stat4*<sup>-/-</sup> mice were analyzed by staining with PerCP-labeled CD4 mAb and biotinylated CXCR5 mAb, followed by APC-labeled streptavidin. Numbers in dot plot quadrants represent the percentages. (D). *Il4*<sup>-/-</sup>, *Ifng*<sup>-/-</sup> and their appropriate controls (WT, 3 mice per group) were immunized with KLH emulsified in CFA. Seven days after the immunization, CD4<sup>+</sup>CD44<sup>hi</sup>CXCR5<sup>+</sup> (Tfh) and CD4<sup>+</sup>CD44<sup>hi</sup>CXCR5<sup>-</sup> (non-Tfh) cells were sorted and restimulated with anti-CD3 for 4 hours for real-time RT-PCR analysis of Th subset-specific genes. The graph shows means  $\pm$  standard deviation (SD).

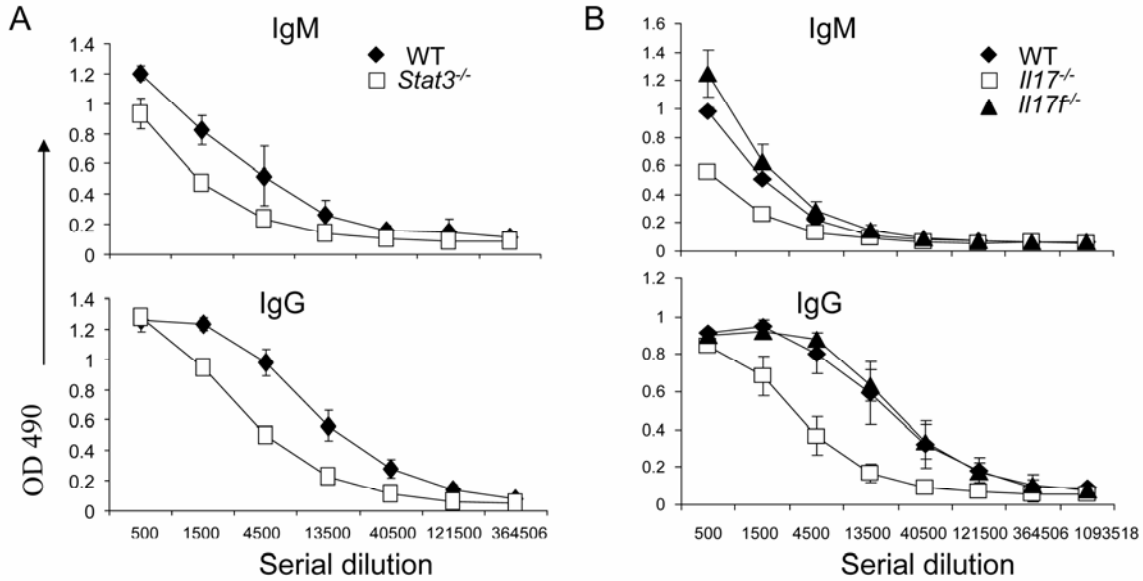

**Figure S5. Regulation of antibody responses by STAT3.** T cell-specific *Stat3*<sup>-/-</sup> (A), *Il17*<sup>-/-</sup>, *Il17f*<sup>-/-</sup> (B) and their controls (WT, 3 mice per group) were immunized with KLH in CFA. Seven days after the immunization, KLH-specific antibodies (IgM and IgG) were measured in the sera by ELISA. The graph shows means ± standard deviation (SD).

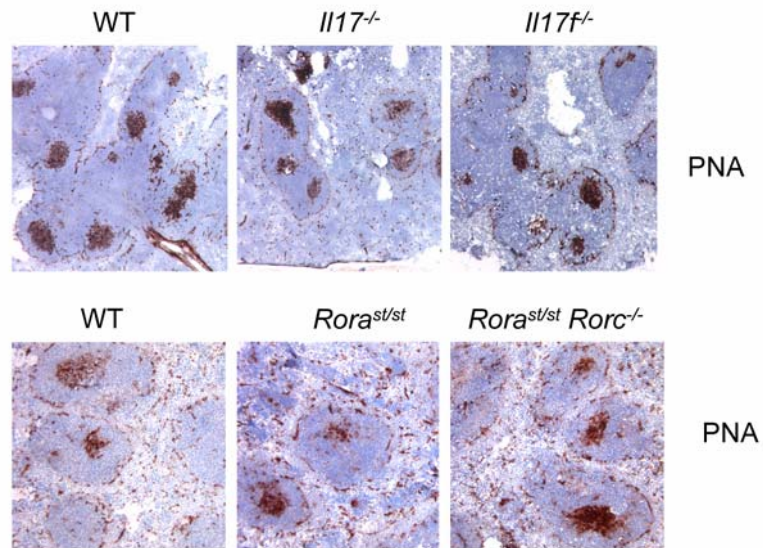

**Figure S6. Normal germinal center reaction in IL-17, IL-17F and ROR $\alpha$ / $\gamma$  deficient mice.** *Il17<sup>-/-</sup>*, *Il7f<sup>-/-</sup>*, *Rora<sup>st/st</sup>*, *Rora<sup>st/st</sup> Rorc<sup>-/-</sup>* mice and their controls (WT, 3 mice per group) were immunized with KLH in CFA. Seven days after the immunization, germinal centers in the spleens of KLH-immunized mice were identified by PNA staining (brown).

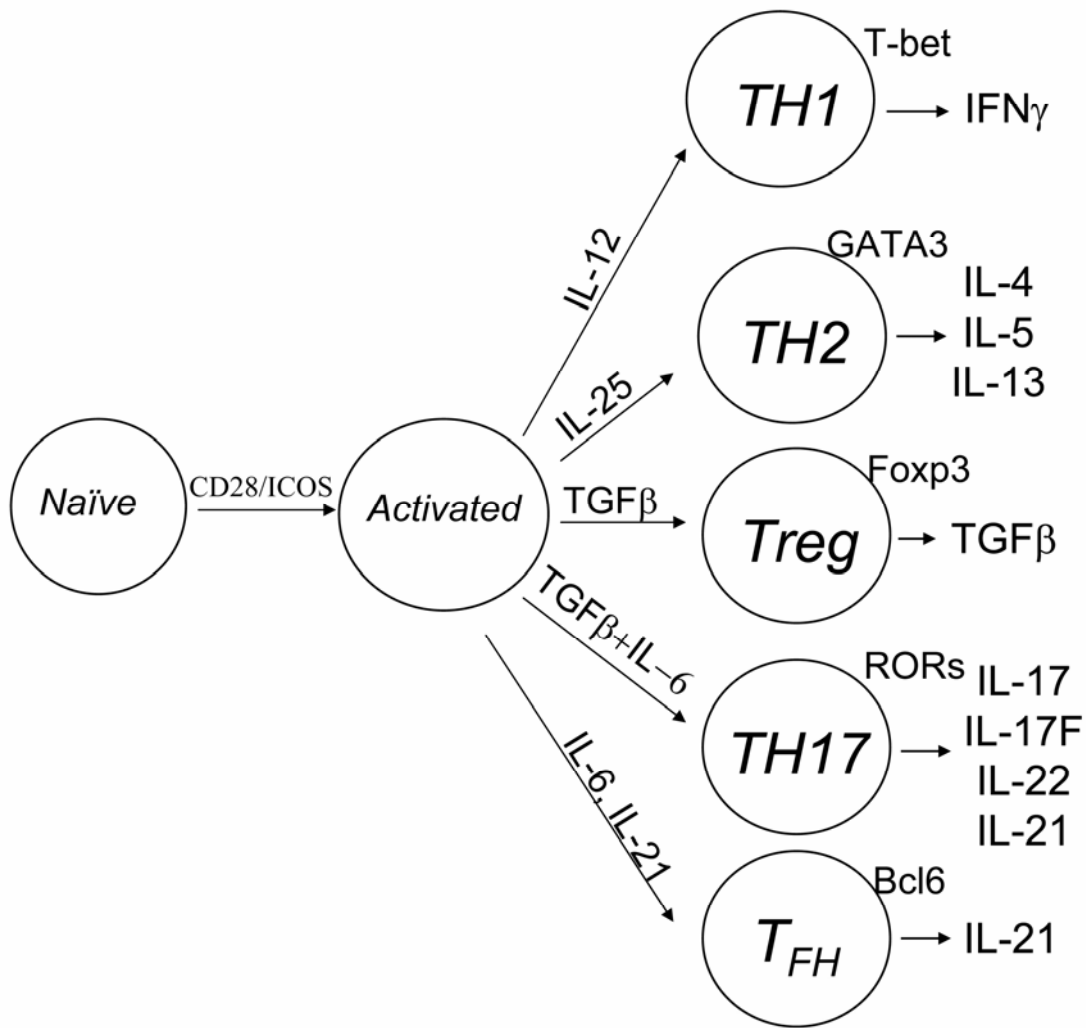

**Figure S7. Schematic demonstration that development of Tfh cells, independent of Th1, Th2 or Th17 lineages, is regulated by IL-6 and IL-21.**
